# Supplementary material for: Genome-wide association study of resistance to Mycobacterium tuberculosis infection identifies a locus at 10q26.2 in three distinct populations
Source: PubMed Central journal article supplement (PMC7963100; doi:10.1371/journal.pgen.1009392), 2021-03-04
Supplement: pgen.1009392.s008.pdf [file pgen.1009392.s008.pdf]

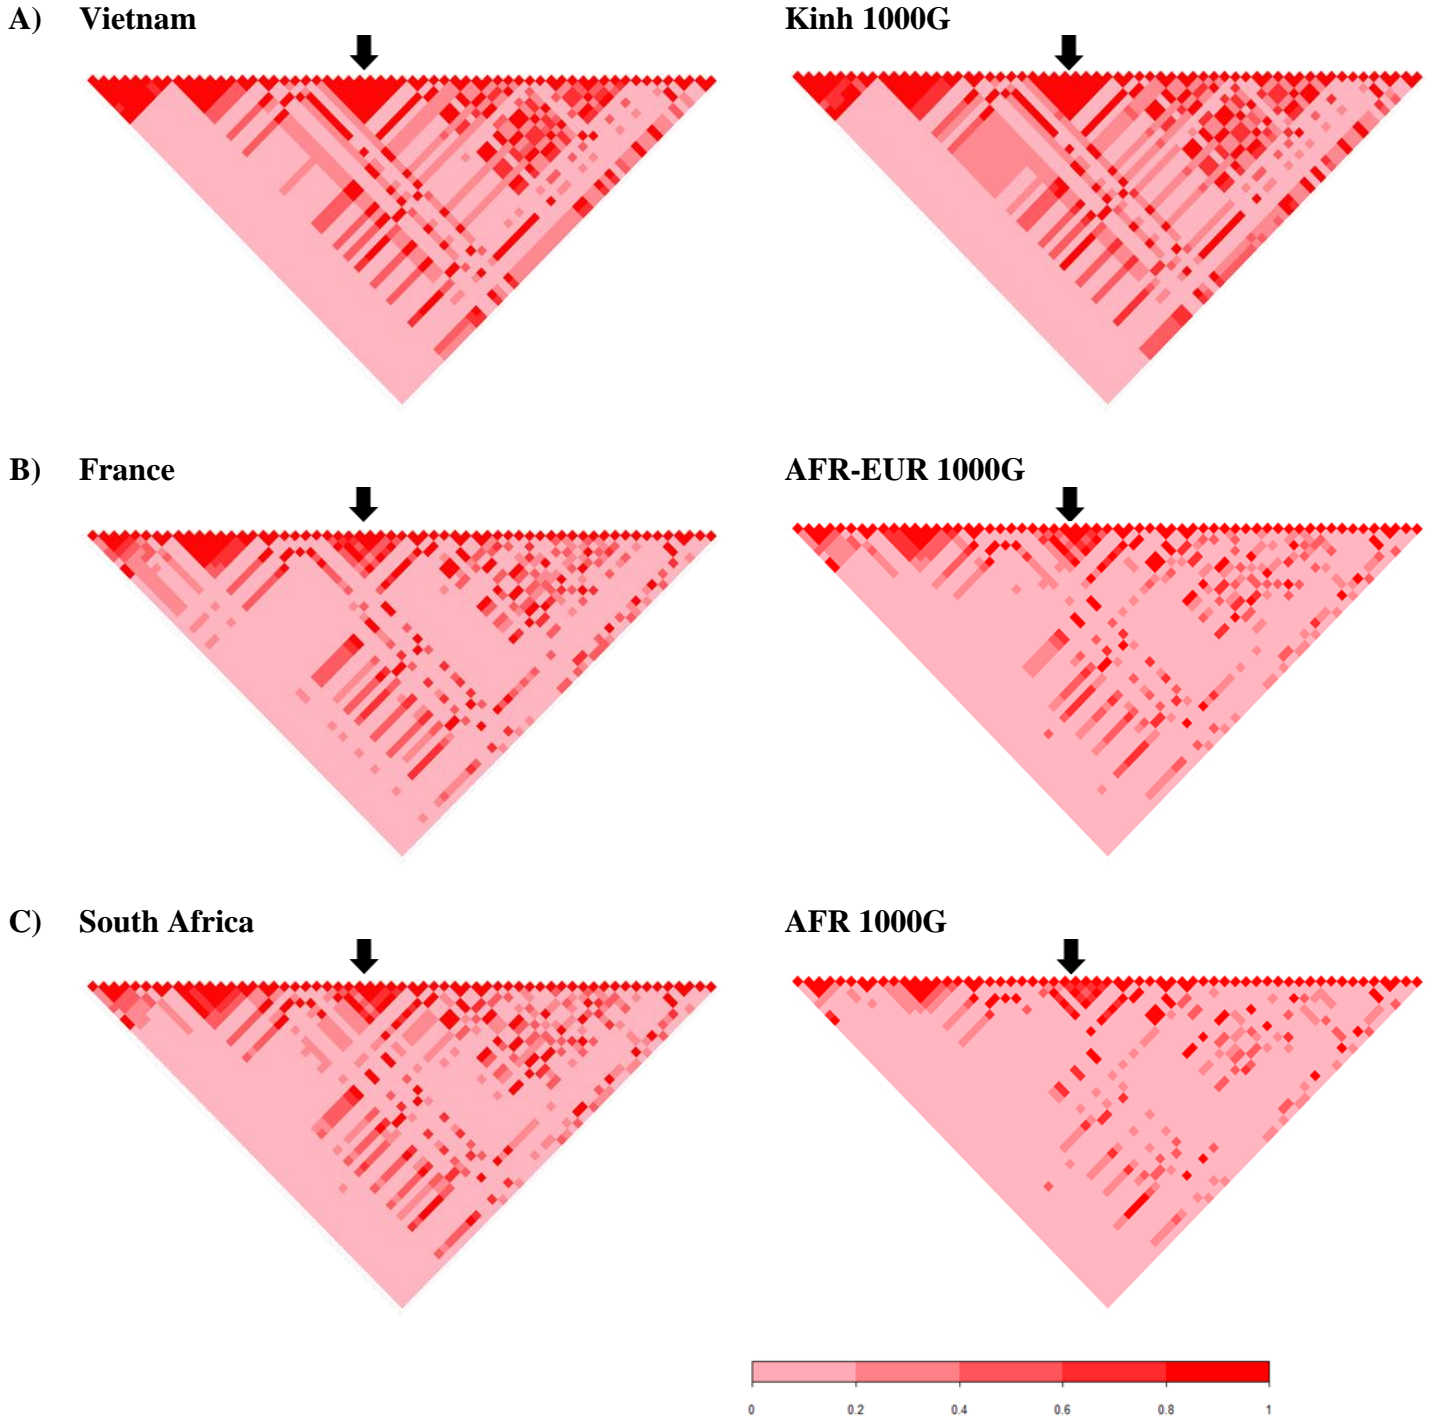

**S7 Figure. Pairwise linkage disequilibrium ( $r^2$ ) in A) Vietnamese, B) French and C) South African study cohorts (left panels) between 60 variants in a 30 kb window around rs17155120 (arrow) as compared to 1000G populations (right panels).**
