# Supplementary material for: Genome-wide association study of resistance to Mycobacterium tuberculosis infection identifies a locus at 10q26.2 in three distinct populations
Source: PubMed Central journal article supplement (PMC7963100; doi:10.1371/journal.pgen.1009392), 2021-03-04
Supplement: pgen.1009392.s009.pdf [file pgen.1009392.s009.pdf]

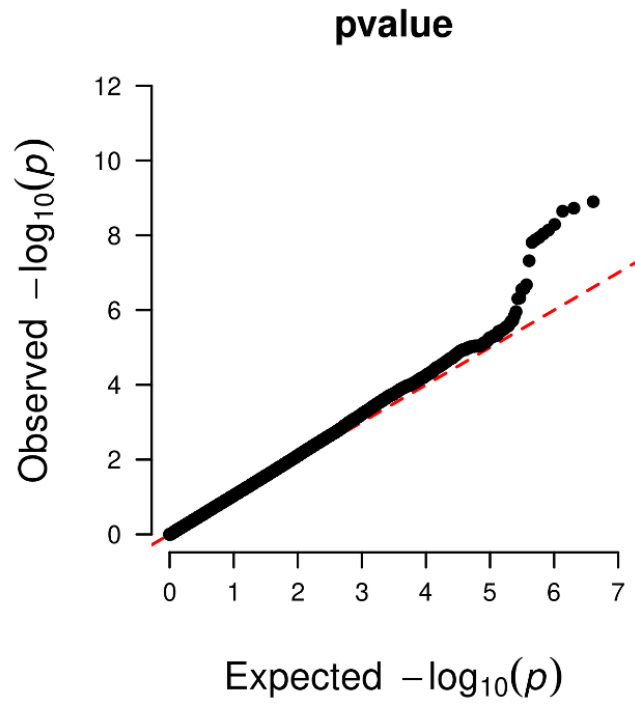

**S8 Figure. Quantile-quantile plot of GWAS of resistance to *M. tuberculosis* infection in the 3 cohorts from Vietnam, France and South Africa (333 uninfected vs 616 infected subjects) ( $\lambda = 1.06$ ).**
