# Supplementary material for: Genome-wide association study of resistance to Mycobacterium tuberculosis infection identifies a locus at 10q26.2 in three distinct populations
Source: PubMed Central journal article supplement (PMC7963100; doi:10.1371/journal.pgen.1009392), 2021-03-04
Supplement: pgen.1009392.s015.pdf [file pgen.1009392.s015.pdf]

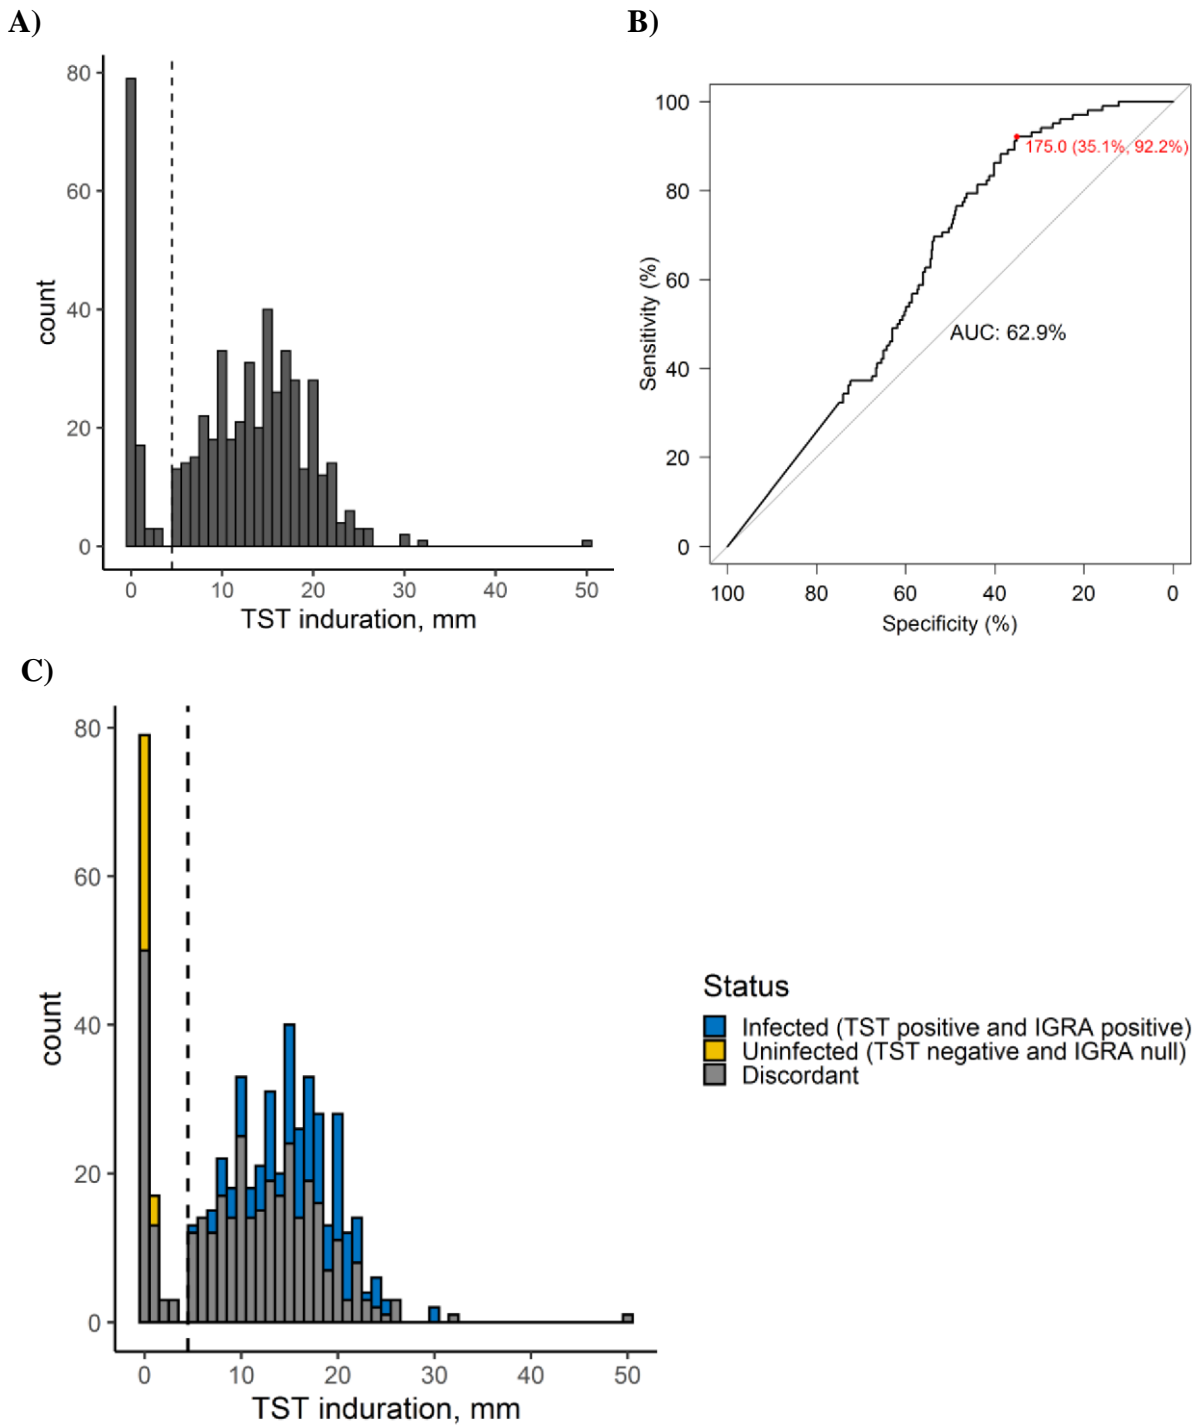

**S14 Figure. Definition of the GWAS phenotype in the household contacts (HHCs) study in France. A)** Distribution of the tuberculin skin test (TST) induration among 516 HHCs (mean induration when 2 screening visits were done). The dashed line represents a 5 mm cut-off. TST was considered negative when the skin induration was i)  $< 5$  mm at both V1 and V2, ii)  $< 5$  mm at V1, when only one visit was done. TST was considered positive when the skin induration was i)  $\geq 5$  mm at both V1 and V2, ii)  $< 5$  mm at V1 and  $\geq 10$  mm at V2. **B)** Construction of a ROC curve based on the defined TST status to determine the optimal interferon- $\gamma$  release assay (IGRA) cut-off (175 pg/mL). **C)** Stacked histogram of the TST distribution stratified by our infection definition. Uninfected subjects (in yellow) presented a negative TST and a null production of IFN- $\gamma$ . Infected subjects (in blue) presented a positive TST and a positive IGRA (IFN- $\gamma$  production  $> 175$  pg/mL).
