# Supplementary material for: Genome-wide association study of resistance to Mycobacterium tuberculosis infection identifies a locus at 10q26.2 in three distinct populations
Source: PubMed Central journal article supplement (PMC7963100; doi:10.1371/journal.pgen.1009392), 2021-03-04
Supplement: pgen.1009392.s022.pdf [file pgen.1009392.s022.pdf]

**S6 Table. Risk factors associated with (i) double positive tuberculin skin test (5 mm cut-off) and QuantiFERON-TB Gold In-Tube results or (ii) double positive TST/QFT-GIT and pulmonary TB patients, compared to the reference group (double negative TST and QFT-GIT results) in household contacts in Vietnam.**

| Characteristics                                               | TST-/QFT-GIT- | TST+/QFT-GIT+ | OR (95%CI)       | TST+/QFT-GIT+/<br>PTB | OR (95%CI)       |
|---------------------------------------------------------------|---------------|---------------|------------------|-----------------------|------------------|
|                                                               | n=188         | n=512         |                  | n=664                 |                  |
| Gender                                                        |               |               |                  |                       |                  |
| Male                                                          | 61            | 189           | ref              | 223                   | ref              |
| Female                                                        | 127           | 323           | 0.84 (0.53-1.33) | 441                   | 0.96 (0.80-1.08) |
| Age, years, mean(sd)                                          | 39(16)        | 32(14)        | 0.78 (0.30-1.62) | 40(13)                | 0.93 (0.53-1.25) |
| BCG vaccination <sup>a</sup>                                  |               |               |                  |                       |                  |
| No                                                            | 99            | 260           | ref              | NA                    | NA               |
| Yes                                                           | 69            | 190           | 1.01 (0.64-1.62) | NA                    | NA               |
| Number of HHC per room, mean(sd)                              | 2.4(1.4)      | 2.4(1.3)      | 0.99 (0.81-1.20) | NA                    | NA               |
| Duration of index cough before treatment, months <sup>b</sup> |               |               |                  |                       |                  |
| <2                                                            | 63            | 193           | ref              | NA                    | NA               |
| 2-3                                                           | 84            | 195           | 1.64 (0.95-2.84) | NA                    | NA               |
| >3                                                            | 40            | 120           | 1.07 (0.57-2.02) | NA                    | NA               |

<sup>a</sup>missing information for 62 individuals

<sup>b</sup>missing information for 5 individuals
