# Supplementary material for: Genome-wide association study of resistance to Mycobacterium tuberculosis infection identifies a locus at 10q26.2 in three distinct populations
Source: PubMed Central journal article supplement (PMC7963100; doi:10.1371/journal.pgen.1009392), 2021-03-04
Supplement: pgen.1009392.s024.pdf [file pgen.1009392.s024.pdf]

**S8 Table. GWAS cohort in France.**

|                             | <b>TST-/IGRA-</b> | <b>TST+/IGRA+</b> |
|-----------------------------|-------------------|-------------------|
| n                           | 30                | 127               |
| Age, years, mean(sd)        | 17(19)            | 28(18)            |
| Sex, %F                     | 57                | 52                |
| TST, mm, mean(sd)           | 0(1)              | 16(4)             |
| IGRA, IFN- $\gamma$ , pg/mL | 0                 | >175              |

IGRA, interferon- $\gamma$  release assay; TST, tuberculin skin test
